# Supplementary material for: Unmet Educational Needs and Clinical Practice Gaps in the Management of Generalized Pustular Psoriasis: Global Perspectives from the Front Line
Source: PubMed Central journal article supplement — Dermatol Ther (Heidelb). 2021 Dec 13;12(2):381–93. doi: 10.1007/s13555-021-00661-2 (PMC8850517; doi:10.1007/s13555-021-00661-2), 2021-12-13
Supplement: 13555_2021_661_MOESM1_ESM.pdf [file 13555_2021_661_MOESM1_ESM.pdf]

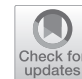

ORIGINAL RESEARCH

膿疱性乾癬（汎発型）の疾患管理における医学教育のアンメットニーズと診療実態における差異：世界各国の医療の最前線で活躍する医師達の視点

Unmet Educational Needs and Clinical Practice Gaps in the Management of Generalized Pustular Psoriasis: Global Perspectives from the Front Line

Bruce Strober · Joyce Leman · Maja Mockenhaupt · Juliana Nakano de Melo · Ahmed Nassar · Vimal H. Prajapati · Paolo Romanelli · Julien Seneschal · Athanasios Tsianakas · Lee Yoong Wei · Masahito Yasuda (安田 正人) · Ning Yu · Ana C. Hernandez Daly · Yukari Okubo (大久保 ゆかり)

Received: October 14, 2021 / Accepted: November 30, 2021 / Published online: December 13, 2021  
© The Author(s) 2021

抄録

**緒言：**膿疱性乾癬（汎発型）（GPP）は生命を脅かす可能性もある稀少な自己炎症性好中球性皮膚疾患であり、無菌性膿疱が繰り返し再燃する全身

症状を特徴とする。GPPの治療管理については、GPPに対する統一された診断基準や承認薬がないことが重大な問題になっている。そこで、GPPの管理における医学教育のニーズや診療ギャップを明らかにするため、GPP患者の治療で直面した課題について議論した。

**方法：**GPP患者の診療経験を共有する目的で2020年7月24日にワークショップが開催され、

B. Strober (✉)  
Central Connecticut Dermatology Research, 1  
Willowbrook Rd, Ste 2, Cromwell, CT 06520, USA  
e-mail: brucestrober30@me.com

B. Strober  
Yale University, New Haven, CT, USA

J. Leman  
BMI Kings Park Hospital, Stirling, UK

M. Mockenhaupt  
Department of Dermatology, Medical Center,  
University of Freiburg, Freiburg im Breisgau,  
Germany

J. Nakano de Melo  
Santa Casa de São Paulo, São Paulo, Brazil

A. Nassar  
Department of Dermatology and Venereology,  
Ain Shams University, Cairo, Egypt

V. H. Prajapati  
Dermatology Research Institute, Calgary, AB,  
Canada

V. H. Prajapati  
Skin Health and Wellness Centre, Calgary, AB,  
Canada

V. H. Prajapati  
Probitry Medical Research, Calgary, AB, Canada

V. H. Prajapati  
Division of Dermatology, Department of Medicine,  
University of Calgary, Calgary, AB, Canada

V. H. Prajapati  
Section of Community Pediatrics, Department of  
Pediatrics, University of Calgary, Calgary, AB,  
Canada

V. H. Prajapati  
Section of Pediatric Rheumatology, Department of  
Pediatrics, University of Calgary, Calgary, AB,  
Canada

P. Romanelli  
Dr. Phillip Frost Department of Dermatology and  
Dermatopathology, University of Miami, Miami, FL,  
USA

J. Seneschal  
Department of Dermatology, National Reference  
Centre for Rare Skin Diseases, Saint-André Hospital,  
Bordeaux, France

10カ国（ブラジル、カナダ、中国、エジプト、フランス、ドイツ、日本、マレーシア、英国および米国）から13名の皮膚科医が参加した。双方向の投票システムを利用して、医療システムの階層別に教育ニーズおよび診療ギャップについて議論し、順位付けを行った。

**結果：**医師個人のレベルでは、GPPの診療経験が乏しいことが診療ギャップにつながる重要項目と確認された。非専門医はGPPの症状や発症機序の理解が不十分であるため、誤診する割合が高く、専門医への紹介や治療の開始が遅れる。患者が最初に総合診療医や救急外来を受診する国では、GPPは感染症と誤診されることが多い。GPPを正確に診断できる皮膚科医であっても、治療に関する知識が乏しければ診療経験がより豊富な他の皮膚科医に紹介する必要がある。医療機関レベルでは、GPPが自己炎症性疾患であると救急外来の医師に認識させ、GPP患者をサポートする集学的医療チーム内の意思疎通および協力体制を強化し、役割分担を明確化する必要性が高かった。規制に関連するレベルでは、信頼性の高い臨床試験

データを集め、明確で一貫性のある治療ガイドラインを策定し、治療薬を承認・上市することが優先事項であるとまとめられた。

**結論：**参加した国々から最も賛同が得られた教育上の課題は、「GPPは適切な治療の開始が遅れると生命を脅かしかねない疾患であることを医師に理解させることと、GPPの診療経験がより豊富な他の医師に患者を紹介すべきタイミングを認識させること」である。

**キーワード：**診療実態における差異・膿疱性乾癬（汎発型）・国際的見解・教育活動における課題

## 要 点

### 本研究の背景

GPPは稀少疾患であるため、どの医療機関でもGPPに関する豊富な診療経験を蓄積することが難しい。

GPP患者の診療経験の共有と教育ニーズおよび診療ギャップの把握を目的として、バーチャルワークショップが開催され、5地域の10カ国から13名の診療に携わっている皮膚科医が参加した。

### 本研究で得られた知見

ワークショップで明らかになった最も重要な教育上の課題は、「皮膚科医も皮膚科医以外の医師も、GPPは正しい治療の開始が遅れると生命を脅かしかねない疾患であることを十分に認識し、GPPの診断および/または治療ならびに継続管理のためにどのタイミングで専門医に患者を紹介すべきかを理解すること」であった。

GPP患者を一定の頻度で診療する機会がある大学病院および地域密着型病院は、自身の経験から学び、診療経験の少ない医療機関と連携してGPPに対して一貫した最善の治療を提供できるよう努めるべきである。

J. Seneschal  
University of Bordeaux, Bordeaux, France

A. Tsianakas  
Fachklinik Bad Bentheim, Bad Bentheim, Germany

L. Y. Wei  
Hospital Sultanah Aminah, Johor Bahru, Malaysia

M. Yasuda  
Department of Dermatology, Gunma University  
Graduate School of Medicine, Maebashi, Gunma,  
Japan

N. Yu  
Shanghai Dermatology Hospital, Shanghai, China

N. Yu  
Tongji University School of Medicine, Shanghai,  
China

A. C. Hernandez Daly  
Boehringer Ingelheim International GmbH,  
Ingelheim am Rhein, Germany

Y. Okubo (✉)  
Department of Dermatology, Tokyo Medical  
University, 6-7-1, Nishishinjuku, Shinjuku-ku,  
Tokyo 160-0023, Japan  
e-mail: yukari-o@tokyo-med.ac.jp

## 緒言

膿疱性乾癬（汎発型）（GPP）は稀少な自己炎症性好中球性皮膚疾患であり、特徴として肉眼で確認できる無菌性膿疱が広範囲に出現（再燃）し、全身性炎症を伴う例と伴わない例がある [1-3]。GPP の有病率は国によって大きく異なり、フランスでは人口 100 万人あたり 1.76 人であるが、日本では人口 100 万人あたり 7.46 人、ドイツでは人口 1 万人あたり 5 人である [4-6]。これまで GPP の診断および名称には一貫性がなく、そのため、その有病率の高精度な推定は難しい。GPP は遺伝子型、表現型および病理所見の点で局面型乾癬（尋常性乾癬）とは明らかに異なり、その症状は患者間でも、同一患者のエピソード間でも異なることがある [3]。GPP は年に何度も再燃することもあれば（再発性 GPP）、より持続性で何年も間隔を置いて間欠的に再燃することもある（持続性 GPP） [1-3]。

GPP は 1909 年に von Zumbusch によって初めて報告されて以来、その発症機序はほとんど解明されておらず、名称、分類、診断法および治療法は実に様々である [1,7]。GPP はこれまで、急性 GPP（von Zumbusch 型）、妊婦の膿疱性乾癬（疱疹状膿痂疹）および乳児 / 若年性膿疱性乾癬など、いくつかのサブタイプに分類されてきた [3,8,9]。GPP はその症状および併存疾患が患者の QOL を著しく損ねることがあるため、サブタイプによらず臨床的負担が大きい [2,3,10,11]。しかも、治療しないと敗血症や多臓器不全などの合併症を引き起こし、生命を脅かすこともある [2,4,11,12]。今世紀に入って報告された研究で、GPP の発症機序に関して、インターロイキン（IL）-36 を介する炎症経路や IL-36 受容体アンタゴニストをコードする *IL36RN* 遺伝子の変異の関与が報告され [13-17]、その理解が深まった。

GPP は稀少疾患であるため、本疾患の治療ガイドラインは、局面型乾癬の治療戦略と GPP に関する少数の症例研究および単群非盲検試験の結果に大きく依拠せざるを得ない [2,18,19]。第一選択薬として推奨されているのは一般に全身療法薬で、レチノイド、メトトレキサート、シクロスポリンおよびインフリキシマブなどである。生物学的製

剤が GPP 治療薬として承認されているのは、日本、台湾およびタイだけである。急性期 GPP を良好に管理するには、最適な薬剤を用いた迅速な治療が必要であるが、GPP の診療経験が乏しいために迅速に診断することも専門医に適切に紹介することもできず、その結果、治療が遅れて治療反応性にも悪影響が生じることがある。GPP という衰弱性疾患についてより広く周知する必要がある。

## 方法

GPP 患者の診断、治療および管理に関する専門家それぞれの経験を共有する目的で、2020 年 7 月 24 日に Boehringer Ingelheim の主催で世界的なバーチャル・ワークショップが開催され、10 カ国（ブラジル、カナダ、中国、エジプト、フランス、ドイツ、日本、マレーシア、英国および米国）から 13 名の診療に携わっている皮膚科医（本稿の著者）が参加した。ワークショップ参加者の診療施設は個人・公的医院、大学病院および政府系医療機関など様々で、診療する GPP 患者数は年間 1～50 人超（中央値 5 人）であり、これには GPP 単発例も複数回再燃例も含まれていた。

このワークショップの包括的な目的は、実臨床で現在用いられている GPP の標準治療（および国による違い）を総括し、GPP 管理における医学教育ニーズおよび診療ギャップを明らかにすることであった。具体的な議題は、ワークショップに先立ち実施したウェブベースのアンケート調査で決定した。このアンケート調査で、著者らは、それぞれの地域での GPP 患者の臨床管理における重要な課題について自身の考えを回答した。アンケートに含める質問項目は、ワークショップの主催者が議長役である Bruce Strober、大久保ゆかりと協議の上で決定した。著者らは、診療ギャップを、マクロ（制度）レベル、メソ（組織 / 機関）レベルおよびミクロ（個々の医師）レベルの 3 つのレベルで検討した。ワークショップでは、双方向のオンライン投票システムを利用して、アンケート調査で確認された GPP 管理上の重要な課題と障壁について議論し順位付けを行った。本稿では、ワークショップで議論された主な議題につ



いて概説し、著者らの個人的意見およびGPPの診断および治療の経験に基づいて明らかにされた教育ニーズおよび診療ギャップを詳述する。

## 倫理ガイドラインの遵守

本稿は過去に実施された試験や個人的経験に基づき執筆されたもので、著者のいずれかが被験者または動物を対象にして新規に実施した試験は含まれていない。

## 結果

### GPPに対する標準治療：視点と課題

ワークショップ前のアンケート調査で確認され、ワークショップで議論された重要な視点と課題を、表1にまとめる。

### 診断

GPPに対する治療を迅速かつ適切に実施するには、迅速な診断が欠かせない。GPPの診断について、12名中9名(75%)が「難しい」または「ときに難しい」と回答したため、ワークショップでは「GPPの診断は難しい場合がある」というコンセンサスが得られた。経験豊富な皮膚科医にとっては、診断は難しくないかもしれないが、皮膚科医以外の医師はGPPを周期性発熱症候群または感染症と誤診することが多く、患者を直ちに皮膚科医に紹介せずに、それぞれステロイド薬または抗菌薬の全身投与による治療を開始する。患者が最初に総合診療医または救急外来を受診した場合、適切な治療の開始が大幅に遅れることがあるため、特に問題である。われわれの経験によると、ブラジル、エジプト、ドイツ、中国および日本などの国では、患者が最初から皮膚科を受診する傾向にあり、そのような国では誤診件数が少ない可能性がある。

GPPの迅速な診断の妨げとなる重要な課題は、局面型乾癬の既往の有無、発症年齢、重症度および臨床経過という点でGPPの臨床症状が不均一

であることと、好中球優勢の炎症を伴う他の疾患、特に急性汎発性発疹性膿疱症(AGEP)との鑑別である。詳細な病歴聴取がGPPとAGEPとの鑑別に役立つと考えられる。例えば、AGEP患者の90%は全身性抗菌薬などのある種の薬剤の投与と関連して発症するが、これに対してGPPは、局面型乾癬の既往がある場合や、ステロイド薬および腫瘍壊死因子 $\alpha$ (TNF $\alpha$ )阻害薬などの全身療法薬を急激に減量した場合に疑われる[20-22]。AGEPはGPPに比べて発症までが早く、一般的にはるかに速やかに改善するため、その臨床経過は鑑別診断の根拠となり得る。

GPPの名称および分類はこれまで大きく変遷してきた[1]。最近になりGPPの診療経験が蓄積され、発症機序に対する理解が深まったことで、日本皮膚科学会(JDA)およびEuropean Rare and Severe Psoriasis Expert Network(ERASPEN)がそれぞれGPPの標準的診断基準を定め、公表した(表2)[1,2]。これらの診断基準に記載された疾患の定義には限界があると考えている。JDAによる定義は乾癬プラークの有無を考慮しておらず、一方、ERASPENによる定義は、GPPに極めて典型的である特徴的な病理組織所見や膿海という臨床所見を含んでいない。しかしながら、参考書に載っているGPPの曖昧な記述は経験の浅い皮膚科医にとっては紛らわしく、JDAおよびERASPENが公表した診断基準はこれらを明確にするのに役立つと考えられる。例えば、膿疱が乾癬プラークに限局する例は、参考書ではGPPに分類されることが多いが、ERASPENの定義ではGPPから除外されている。

### 治療

GPPの治療で最も難渋するとワークショップで確認されたこととして、GPPの皮膚症状および全身症状を確実にコントロールするには迅速な意思決定が必要なことが挙げられる。診断の問題だけでなく、治療開始前に他の疾患(結核症および悪性腫瘍など)を解消しておく必要があり、つまりGPP患者が発症後48時間以内に最適な治療を受けられない場合があることを意味する。また、

**表 1** ワークショップで確認された GPP の診断・治療・継続管理における重要な視点と課題

|      |                                                                                                                                                                                                                                                                                                                                                                                          |
|------|------------------------------------------------------------------------------------------------------------------------------------------------------------------------------------------------------------------------------------------------------------------------------------------------------------------------------------------------------------------------------------------|
| 診断   | <p>GPP を正確に診断する上で鑑別診断に重要な課題がある。</p> <p>皮膚科医以外の医師は GPP を誤診することが多く、そのために専門医への紹介が遅れたり、治療が適切ではない方法で開始されたりする。</p> <p>GPP の ERASPEN による定義にも JDA による定義にもいくつかの limitation がある。</p> <p>経験の浅い皮膚科医および皮膚科医以外の医師は GPP 患者を診療する機会がほとんどなく、そのため多くは GPP に対する適切な治療および管理への理解が乏しい。</p>                                                                                                                        |
| 治療   | <p>GPP に対して最も広く用いられている治療薬はレチノイド、メトトレキサートおよびシクロスポリンであるが、国によっては生物学的製剤が上市され、より良い疾病管理がなされている。</p> <p>皮膚科医が GPP に対してどのような治療効果を期待するかは、選択した治療薬の種類による。</p> <p>生物学的製剤は GPP に対する有望な治療選択肢である。</p> <p>高額な薬剤費や保険給付上の制約のため、GPP 患者は最も有効な治療薬を使用できないことがある。</p> <p>多くの場合、GPP の管理には集学的医療チームが連携してあたることが望ましいが、共同意思決定にはそれ独特の難しさがある。</p> <p>現在、GPP 治療薬の選択を補助するガイドラインはなく、GPP の管理を支援するにはそのようなガイドラインの作成が必須である。</p> |
| 継続管理 | <p>GPP の疾患重症度を評価するためのガイドラインが作成され、有効なツールが開発されれば、皮膚科医はより効率良く患者の評価を実施できるようになると期待される。</p> <p>GPP の再燃を防止するためには、患者に疾患管理における自身の役割を理解させることが重要である。</p> <p>GPP 患者のケアにおいて併存疾患の管理は大きな課題であり、その手引きや研究がさらに必要である。</p> <p>GPP 患者の心理的フォローアップはその長期ケアで重要な（しばしば見過ごされる）側面である。</p> <p>地域間の差異や社会経済的因子が GPP 患者の治療を妨げる要因となり得る。</p>                                                                                 |

ERASPEN : European Rare and Severe Psoriasis Expert Network、GPP : 膿疱性乾癬 (汎発型)、JDA : 日本皮膚科学会

医師が最新の治療情報を知らない可能性があり、これによってさらに治療開始が遅れる。もう1つの大きな問題は、ほとんどの国で GPP に対する治療薬が承認されていないことである。本稿執筆時点で、GPP に対する生物学的製剤が小規模な単群臨床試験の成績に基づいて承認されているのは日本、台湾およびタイだけである。また、標準治療ガイドラインは作成されていない\*1。

われわれが GPP の治療によく用いる薬剤はレチノイド、メトトレキサートおよびシクロスポリンであり、これまでの報告と一致している [2,9,13]。シクロスポリンは腎移植を施行した妊婦に投与して忍容性良好であったと報告され、催奇形性はないと考えられる [2] ため、他に治療薬がない場合には妊娠中の GPP 患者の治療によく用いられている。ステロイド薬は不適切な減量によって GPP

\*1 訳注：日本では日本皮膚科学会 GPP 診療ガイドラインがある

表2 公表されている GPP の診断基準

| ERASPEN [1]                                               | JDA [2]                                                             |
|-----------------------------------------------------------|---------------------------------------------------------------------|
| 肉眼で視認可能な原発性無菌性膿疱が四肢末端以外の皮膚に存在する（ただし、膿疱が乾癬プラークに限局する場合は除く）。 | (i) 発熱あるいは全身倦怠感等の全身症状を伴う。                                           |
| 全身性炎症を伴うことがある。                                            | (ii) 全身または広範囲の潮紅皮膚面に無菌性膿疱が多発し、ときに融合し膿海を形成する。                        |
| 局面型乾癬を伴うことがある。                                            | (iii) 病理組織学的に Kogoj 海綿状膿疱を特徴とする好中球性角層下膿疱を証明する。                      |
| 再発性(2エピソード以上)または持続性(3ヵ月超)である。                             | (iv) 以上の臨床的、組織学的所見を繰り返し生じること。                                       |
| GPP は少なくとも 1 回以上再発するか 3 ヶ月を超えて持続する場合にのみ診断すること。            | 以上の 4 項目を満たす場合を膿疱性乾癬（汎発型）の確実例と診断する。項目 (ii) と (iii) を満たす場合を疑い例と診断する。 |

ERASPEN : European Rare and Severe Psoriasis Expert Network、GPP : 膿疱性乾癬（汎発型）、JDA : 日本皮膚科学会

が再燃するおそれがあり、妊婦には慎重に投与すべきである [2,9]。

GPP 治療の重要な課題である併存疾患についても議論した。これは、GPP に対する治療選択肢のほとんどに毒性や、禁忌となり得る疾患がある [2] ため、例えば、肝障害のある患者や妊孕性のある女性患者へのメトトレキサート投与の是非については、慎重に検討する必要がある。

われわれが期待する治療効果は、治療薬に応じて異なることがわかり、予想される効果は症例ごとに検討する必要があるということで意見が一致した。例えば、アシトレチンを用いると数日以内（最長でも 1 週間以内）に解熱および膿疱消失が期待できるが、メトトレキサートの効果発現にはこれよりも長くかかるのが一般的である。一部のワークショップ参加者は、アシトレチンの効果が 1 週間以内に認められない場合、有害事象発現や忍容性低下を懸念して増量をためらうかもしれないと指摘した。また、シクロスポリンが投与開始後 3～6 ヶ月以内に奏効しない場合、通常は別の全身療法に切り替える。

日本から参加した皮膚科医は、生物学的製剤が上市されてから GPP の管理が改善したと述べた。

日本では GPP 治療薬として複数の生物学的製剤が承認され、TNF $\alpha$  に対するモノクローナル抗体製剤（アダリムマブ、インフリキシマブおよびセルトリズマブ ペゴル）[2,23]、IL-17 阻害薬（セクキヌマブ、イキセキズマブおよびプロダルマブ）[2]、IL-23 阻害薬（グセルクマブおよびリサンキズマブ）[24,25] が使用されている。生物学的製剤が GPP 治療薬として承認されていない国では、その使用制限がさらに強いものになっている。一部の国では高額であるために生物学的製剤の使用が普及していない。保険給付を受けるには通常、GPP 治療薬としての薬事承認がなされていることが前提であり、承認済みでも、他の全身療法が無効または忍容不能である場合にだけ生物学的製剤の使用を認めることが多い。このように、生物学的製剤が上市されている国であっても患者の薬剤費負担能力がその早期使用を阻む大きな要因となっている。GPP が長期の治療を要することも患者にとってさらなる経済的負担となり得る。初期の疾患コントロールが不十分であった場合にかかる費用（仕事や学校を休むことによる経済的影響、複数回の外来・救急外来受診の費用および複数回の入院の費用を含むが、これに限定されるわけで



はない)は、最初から(高額であっても)より効果の高い治療を行った場合の費用よりも高くなる可能性があることに留意すべきである。

### 継続管理

われわれは、治療効果のモニタリングに利用できる有効な評価ツールがないと治療中のGPP患者の経過観察を実施できない、ということで意見がまとまった。ほとんどのツールはGPPに特有の急激な日々の変動を捉えることができない。GPP患者で認められる膿疱、浮腫および紅斑の面積と重症度を評価する指標となるスコアリングシステムが開発されれば、重症度の評価、ならびに全身療法や入院の必要性の判断に役立つであろう<sup>\*2</sup>[26]。今後の再燃を遅延または抑制することもGPPの長期管理の目標である。治療薬で長期管理を行えるとしても、トリガーとなり得る因子を回避するよう心掛けることを患者自身が理解することが重要である。疾患経過を慎重に観察した上で、患者が期待することを明確にすることが必要になるであろう。適切な心理的フォローアップや遺伝カウンセリングなど、患者やその家族の幅広いニーズにこたえるには、密に連携した集学的医療チームが必要かもしれない。GPP患者は、治療効果が得られなかった場合の諸問題と長期の治療に伴う経済的負担の両方に関する大きな心理的負担を強いられる。さらに、小児GPP患者の場合、専門家の特別なサポートを要する。

### 診療ギャップと教育ニーズ

われわれは、GPPの効果的な管理を行う上での課題と阻害要因について議論した結果、最終的にGPP患者のアウトカムを改善するには特定の診療ギャップおよび教育ニーズに対処していくことが重要と考えた。これらの格差およびニーズを、医療制度のレベルにより「マクロ」レベル(規制、経済および制度レベルの要因)、「メソ」レベル(医療機関または病院レベルの要因)および「ミクロ」レベル(医師個人レベルの要因)に分類した。ワークショップでは、それぞれの地域においてGPP

管理に対する重要な課題となっている格差について投票を行った(図1)。

### 規制、経済および医療制度レベルの要因(「マクロ」レベル)

規制に関連するレベルでは、重要な診療ギャップとして、一貫した臨床試験データがないこと<sup>\*3</sup>が最も票を集め、次いで票を集めたのは、治療ガイドラインがないこと、治療薬が承認されていないこと(ただし、日本には当てはまらない)であった(図1a)。手引きが求められるGPP管理上の重要事項は、GPPに対する第一選択薬および第二選択薬の明確化、GPP再燃時の治療およびGPPに対する“レスキュー”治療、GPPと併存疾患の管理、ならびにGPP患者のリハビリテーションなどである。GPPは稀少疾患であるため多数の患者を対象とした大規模ランダム化比較試験を実施することが難しく、そのためGPP治療薬の安全性および有効性は限られたデータに基づくものである。しかも、GPPは自然経過によって悪化と軽快を繰り返すことがあるため、GPP患者に対する新薬の有効性評価には難しい面がある。現在公表されているガイドラインやレビューでは多くの症例報告や症例集積研究の報告が引用されている[2,9,18,27]が、個々の症例での否定的な成績が投稿されることはほとんどなく、これらのデータはバイアスを含む可能性がある。一貫したデータがないために強い推奨事項を記載した明確なGPP管理ガイドラインを作成することは難しく、多くの国では依然として、既存の局面型乾癬のガイドラインに従ってGPPの治療を行っている。米国では、2012年に膿疱性乾癬の治療ガイドラインが公表されたが、上市された新しい生物学的製剤を記載した改訂版は未だ発行されていない[8,18]。日本ではより最近(2018年)に改訂されたGPP診療ガイドラインがある[2]。このガイドラインは医師が実際の診療で利用する枠組みを示したものであるが、上述のようにデータが限られており、確定的な推奨事項を示している訳ではない。エビデンスに基づく推奨事項がないため、医師は様々な治療薬に関する個人的経験に基づいたアプロー

<sup>\*2</sup> 訳注：日本では日本皮膚科学会GPP診療ガイドラインの重症度スコアはこのような用途で用いられている

<sup>\*3</sup> 訳注：日本では日本皮膚科学会GPP診療ガイドラインがある

## (a) 規制、経済および医療制度レベルの要因（「マクロ」レベル）

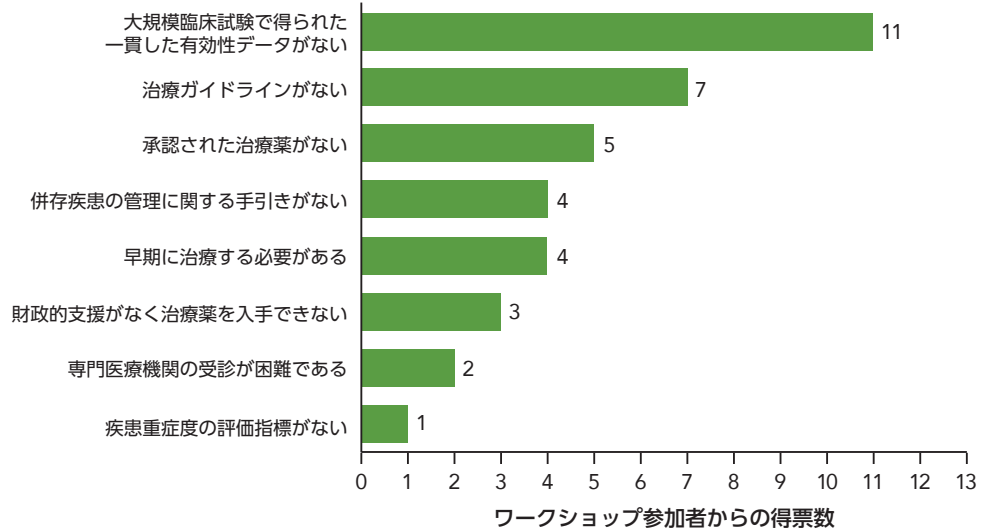

## (b) 医療機関または病院レベルの要因（「メソ」レベル）

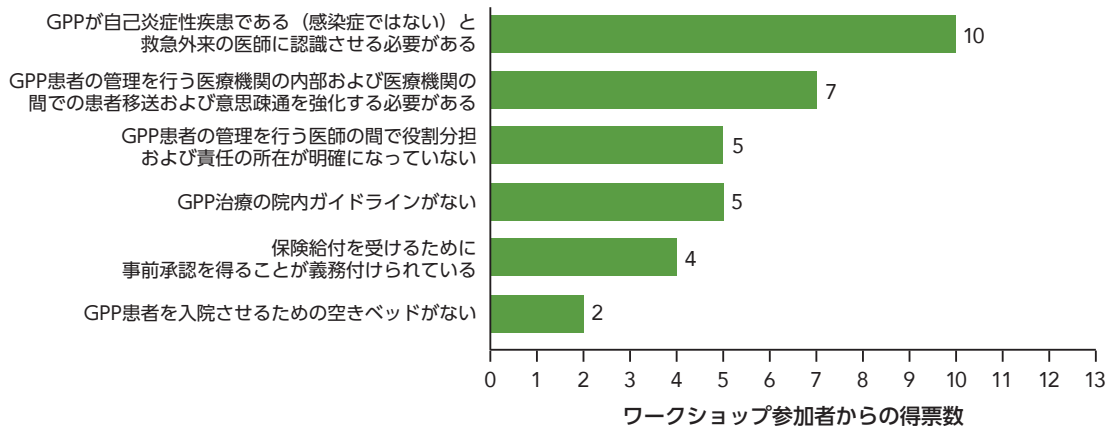

## (c) 医師個人レベルの要因（「ミクロ」レベル）

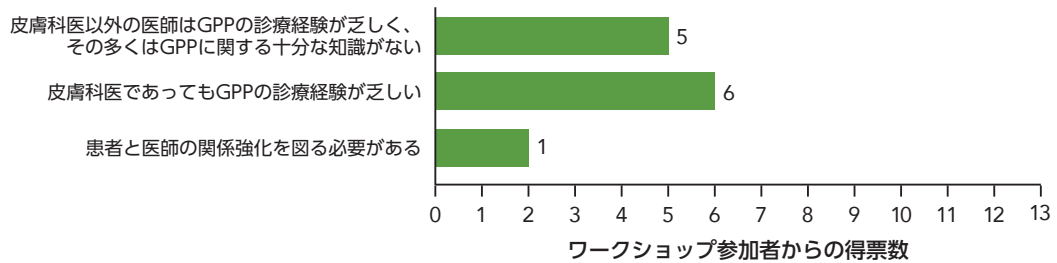

**図1** ワークショップ参加者がそれぞれの国での重要事項と捉えている診療ギャップおよび教育ニーズ。(a) 規制、経済および医療制度レベルの要因、(b) 医療機関または病院レベルの要因、(c) 医師個人レベルの要因。これらの診療ギャップ/教育ニーズは、会議前のアンケート調査で得られた情報に基づく。バーチャル会議に参加した皮膚科医らに対して、会議中に、それぞれの国で最も重要な診療ギャップ/教育ニーズを各グループから3つ選ぶよう求めた。棒グラフはその診療ギャップ/教育ニーズに投票した皮膚科医の数を示す。GPP：膿疱性乾癬（汎発型）



チを取らざるを得ない。個々の治療薬の使用経験は国によって大きく異なるため、現在得られている臨床データを基にしてすべての状況に当てはまる治療ガイドラインを作成することは不可能である。治療薬の入手可能性や財政的支援の状況は国によって大きく異なり、日本でのGPPの臨床像を他の国に当てはめることはできないため、日本のガイドラインを他の国で使用するのは適切ではない。承認済みのGPP治療薬がない国から参加した5名は、重要な診療ギャップとして承認済みの治療薬がないことを挙げた。また、全参加者の4分の1が、財政的支援がないため治療薬を入手できないことが問題であると指摘した。

#### **医療機関または病院レベルの要因 (「メソ」レベル)**

医療機関レベルでは、重要な診療ギャップとして、GPPが感染症ではなく自己炎症性疾患であると救急外来の医師に認識させる必要があるということが最も票を集めた (図1b)。皮膚科を最初から受診することが難しい国 (カナダおよびマレーシア) では、患者は総合診療医を介さずに病院の救急外来を受診する傾向が強くなると考えるが、救急外来の医師がGPP患者を誤診することは珍しいものではない。GPPの症状は自己炎症性疾患よりも感染症とみなされることが多く、そのため、救急外来の医師による不適切な治療薬の処方頻繁に起こる。その結果、患者は通常、救急外来を数回受診した後によく適切な専門医に紹介されることになる。

上記の他に本ワークショップでは、医療機関レベルの重要な診療ギャップとして、GPP患者の治療からリハビリテーションに至るまでその管理を行う医療機関の内部および医療機関の間で、意思疎通および患者移送を強化する必要性が挙げられた。GPP管理を行う集学的医療チーム内で、患者の相談窓口など、役割分担・責任の所在を明確化するのは極めて重要であるということで意見が一致した。GPP患者の管理には、皮膚科、リウマチ科、遺伝子診療科、循環器科およびHDU/ICUの医師など、複数の関係者が関わると予想される。場合によっては、GPP患者の長期管理に栄養学の専門

家加わって、虚弱な患者での治療成功率を最大限まで高めようとする。各患者の管理計画を作成する際にはこれらの専門家全員を含めることが重要であるが、集学的医療チーム内で作業することで特有の難しい問題が生じることもある。例えば、小児GPP患者に対して全身性抗炎症薬を処方しようとする皮膚科医もいれば、そのような若年の患者に処方するのは不適切ではないかと疑問を呈する医師もいるであろう。

医療機関レベルでの治療に関連する診療ギャップとしては、ある種の治療薬、特に生物学的製剤を使用する際の使用許可申請や保険の事前承認の手続きをより簡略化する必要性も挙げられる。

#### **医師個人レベルの要因 (「ミクロ」レベル)**

医師個人のレベルでGPP管理上の重要な教育・診療ギャップと確認されたのは、ほとんどが診断と初期治療に関するものであった。個人レベルでは、皮膚科医の間でも皮膚科医以外の医師の間でもGPPの診療経験が乏しいことが重要なギャップと確認された (図1c)。(カナダやマレーシアなど) 国によっては、GPP患者は皮膚科を最初から受診することができないため、発症後に総合診療科を受診すると予想され、その結果、誤診や不適切な治療を受けることがある。総合診療医によるGPPの正確な診断は期待し難いものの、GPPが疑われる患者をできる限り速やかに紹介して迅速かつ適切な治療につなげる必要があることを総合診療医は理解すべきである。これに対して、ブラジル、エジプト、ドイツ、日本および米国などの多くの国では、GPP発症後に総合診療医を受診するという習慣がなく、GPPを発症した患者は皮膚科医を最初から受診する。皮膚科医以外の医師がGPP疑い例を皮膚科医に紹介して正確な診断を仰ぐのは当然と思えるが、皮膚科医であってもGPPの治療に不安を感じるのであれば、別の皮膚科医に紹介することも同じくらい重要である。経験の浅い皮膚科医は、参考書でGPPの記述を読んだことがある程度と思われ、今後のキャリアの中でGPP患者を診療する機会はほんの数回かもしれない。しかも、GPP患者はより経験豊富な皮膚科医

に紹介され、診療を受けることが多いため、経験の浅い皮膚科医がGPP患者を診断から治療・経過観察までフォローする機会は限られる。この場合の懸念事項は、最新の治療薬とその使用方法に関する知識がないことである。教育上の重要な課題は、皮膚科医も皮膚科医以外の医師も、GPPは適切な治療の開始が遅れると生命を脅かしかねない疾患であることを十分に認識し、どのタイミングで専門医に患者を紹介すべきかを理解することである。

患者と医師の関係を強化する必要があることも重要な診療ギャップであると指摘された。GPP患者は大きな心理的負担を強いられるため、長期の経過観察およびサポートを連携して行うことが重要である。患者の方は維持療法を続け、GPPの発症要因となる因子を回避して再燃後の管理に積極的に参画する必要がある。したがって、患者教育によりGPPの継続管理および再燃防止における自身の役割を患者に理解してもらうことが重要である。

## 結論

GPPは稀少疾患であるため、どの医療機関でもGPPに対して豊富な治療経験を蓄積することが難しい。最も重要な教育上の課題は、皮膚科医も皮膚科医以外の医師も、GPPは適切な治療の開始が遅れると生命を脅かしかねない疾患であることを十分に認識し、GPPの診断および/または治療、継続管理のためにどのタイミングで専門医に患者を紹介すべきかを理解することである。GPP患者を診療する機会の多い大学病院および地域密着型病院の医師は、自身の経験から効率よく学び、GPPの診断・治療の能力をさらに伸ばす努力をすべきである。そのような専門医を擁する医療機関であれば、他の医療機関と連携して、GPP患者に対して一貫した最善の治療を提供できるであろう。

## 謝辞

**研究資金の提供** 本稿で述べたワークショップは、Boehringer Ingelheimの後援によって開催され

た。Boehringer Ingelheimから提供された資金で、Ogilvy Health (ロンドン、英国)がバーチャル・ワークショップの運営を行った。著者らは本稿執筆に関連する謝礼を受領していない。Boehringer Ingelheimと著者らが交わした契約には、研究データの秘密保持が含まれていた。Boehringer Ingelheimが本誌のRapid Service料を支払った。

**オーサーシップ** 著者全員が、本稿に関し、医学雑誌編集者国際委員会(ICMJE)の著者基準を満たし、本研究全体の公正性に責任を持ち、本稿最終版を承認した。

**メディカルライティング、編集およびその他の補助作業** 本稿執筆にあたり、OPEN Health Communications (ロンドン、英国)のEsther Race, PhDとLeigh Church, PhDがメディカルライティング、編集およびフォーマット調整のサポートを行い、この費用はBoehringer Ingelheimとの契約に基づき同社が負担した。

**著者の貢献** 著者全員 (Bruce Strober, Joyce Leman, Maja Mockenhaupt, Juliana Nakano de Melo, Ahmed Nassar, Vimal H. Prajapati, Paolo Romanelli, Julien Seneschal, Athanasios Tsianakas, Lee Yoong Wei, Masahito Yasuda, Ning Yu, Ana C. Hernandez Daly および Yukari Okubo) が、本稿の企画、構成の検討および草稿執筆に等しく貢献した。

**倫理ガイドラインの遵守** 本稿は過去に実施された試験や個人的経験に基づくもので、著者のいずれかが被験者または動物を対象に新たに実施した試験は含まれていない。

**データ利用に関する事項** 臨床試験結果の解釈の独立性を保つため、Boehringer Ingelheimは、すべての社外の著者に対して、被験者レベルの臨床試験データを含むすべての関連資料ならびにICMJEの基準の下で著者としての役割および義務を果たすのに必要な関連資料の閲覧を認めている。さらに、一

次文献が査読付き雑誌に掲載され、薬事業務が完了し、BI Policy on Transparency and Publication of Clinical Study Dataに基づき他の基準を満たす場合には、臨床試験関連文書（試験総括報告書、試験実施計画書、統計解析計画書など）および被験者の臨床試験データを共有可能とする（<https://vivli.org/>）。文書は公開前に精査し、必要に応じて編集し、被験者や試験関係者の個人情報を守り、被験者のインフォームドコンセントで形成された合意内容を尊重するためにデータを匿名化する。試験総括報告書や臨床関連文書も <https://vivli.org/> のリンクから閲覧申請することができる。申請はすべて Document Sharing Agreement に沿って処理される。資格要件を満たす誠実な科学・医学研究者は、必要とするデータセットの構造と内容を記した書類を添えて、匿名化した解析可能な被験者の臨床試験データの閲覧を申請することができる。承認され、また Data Sharing Agreement で認められれば、データをセキュリティ保護されたデータアクセスシステムを介して1年間の期限付きで共有する。この期間は申請があれば延長可能である。試験データの閲覧申請には <https://vivli.org/> のリンクを利用すること。詳細は以下のウェブサイトに記載されている。 <https://www.mystudywindow.com/msw/datasharing>

**開示事項** Bruce Strober は、AbbVie、Almirall、Amgen、Arcutis、Arena、Aristea、Asana、Boehringer Ingelheim、Immunic Therapeutics、Bristol Myers Squibb、Connect Biopharma、Dermavant、Equillium、Janssen、LEO Pharma、Eli Lilly、Maruho、Meiji Seika Pharma、Mindera、Novartis、Pfizer、GlaxoSmithKline、UCB Pharma、Sun Pharma、Ortho Dermatologics、Regeneron、Sanofi Genzyme および Ventyxbio のコンサルタント（報酬受領）、AbbVie、Eli Lilly、Janssen および Sanofi Genzyme の講演者、CorEvitas (Corrona) Psoriasis Registry の共同科学責任者（コンサルタント料受領）、Dermavant、AbbVie、Corrona Psoriasis Registry、Dermira、Cara Therapeutics および Novartis の治験担当医師、*Journal of Psoriasis and Psoriatic Arthritis* の編集長（報酬受領）を

務めたことがある。Joyce Leman は、生物皮膚科学（biodermatology） 研究員としてLEO Pharmaとの短時間雇用契約の締結と、Boehringer Ingelheim International GmbH からのGPPアドバイザーボードメンバーとしてのコンサルタント料受領を報告している。Maja Mockenhaupt は以下の利益相反を報告している：大学（研究ユニット「dZh-RegiSCAR」のため）とTibotec-Janssen、Boehringer Ingelheim、Bayer Pharma、Sanofi-Aventis および Janssen との契約を介して皮膚副反応の解析に関する助成金の受領；Merck および Pfizer から皮膚副反応に関するコンサルタント料の受領；Vivants Clinics Berlin、DERFO Essen、Forum Derma Mannheim、Interdisziplinäre Fobi Dresden、SIMID Verona、Galderma Symposium Stockholm、Derma Fobi Freiburg および Medicademy course Copenhagen から講義、講演、スピーカーズビューロー、原稿執筆または教育イベントに対する報酬の支払い；重度の皮膚副反応に関する裁判事例での専門家としての証言に対する支払い。Ahmed Nassar は、Sanofi および Boehringer Ingelheim の治験担当医師を務めたことがあり、Boehringer Ingelheim International GmbH からGPPアドバイザーボードメンバーとしてコンサルタント料を受領したことがある。Vimal H. Prajapati は、AbbVie、Amgen、AnaptysBio、Arcutis、Arena、Asana、Bausch Health、Boehringer Ingelheim、Bristol Myers Squibb、Celgene、Concert、Cor-Evitas (Corrona)、Dermavant、Dermira、Eli Lilly、Galderma、Incyte、Janssen、LEO Pharma、Nimbus Lakshmi、Novartis、Pfizer、Regeneron、Sanofi Genzyme、UCB Pharma および Valeant の治験担当医師を務めたことがあり、AbbVie、Actelion、Amgen、Aralez、Arcutis、Aspen、Bausch Health、Boehringer Ingelheim、Bristol Myers Squibb、Celgene、Cipher、Eli Lilly、Galderma、GlaxoSmithKline、Homeocan、Janssen、LEO Pharma、L'Oreal、Medexus、Novartis、Pediapharm、Pfizer、Sanofi Genzyme、Sun Pharma、Tribute、UCB Pharma および Valeant のアドバイザー、コンサルタントおよび/または講



演者を務めたことがある。Lee Yoong Wei は、Boehringer Ingelheim International GmbH から GPP アドバイザリーボードメンバーとしてコンサルタント料を受領し、AbbVie から講演料を受け取ったことがある。Masahito Yasuda は、Eli Lilly の治験担当医師を務めている。Ana C. Hernandez Daly は Boehringer Ingelheim の社員である。Yukari Okubo は、Eisai、Maruho および Shiseido Torii から助成金受領または業務請負、AbbVie、Amgen、Boehringer Ingelheim、Bristol Myers Squibb、Celgene、Eisai、Eli Lilly、Janssen Pharma、JIMRO、Kyowa Kirin、LEO Pharma、Maruho、Novartis Pharma、Pfizer、Sanofi、Sun Pharma、Taiho、Tanabe-Mitsubishi、Torii および UCB Pharma からコンサルタント料受領、AbbVie、Amgen、Boehringer Ingelheim、Bristol Myers Squibb、Celgene、Eisai、Eli Lilly、Janssen Pharma、JIMRO、Kyowa Kirin、LEO Pharma、Maruho、Novartis Pharma、Pfizer、Sanofi、Sun Pharma、Taiho、Tanabe-Mitsubishi、Torii および UCB Pharma から講義料、講演料、スピーカーズビューロー、原稿執筆または教育イベントに対する報酬の支払いを報告している。Juliana Nakano de Melo、Paolo Romanelli、Julien Seneschal、Athanasios Tsianakas および Ning Yu には開示すべき事項はない。

**オープンアクセス** 本論文は Creative Commons Attribution-NonCommercial 4.0 International License の下で公開されている。本ライセンスは、原著者および情報源を適切に明示し、Creative Commons ライセンスへのリンクを示し、改変の有無を表示する限りは、いかなる媒体およびフォーマットでの非営利的使用、共有、改作、配布および複製をも許可するものである。本論文の Creative Commons ライセンスは本論文に含まれる画像や他の第三者の素材にも適用されるが、素材のクレジットラインに別途記載がある場合はこの限りではない。本論文の Creative Commons ライセンスが素材に適用されず、使用目的が法的規制で認められないか許容範囲を超えている場合には、著作権者から直接許可を得

る必要がある。このライセンスの詳細は以下のウェブサイトで見ることができる。<http://creativecommons.org/licenses/by-nc/4.0/>

## REFERENCES

1. Navarini AA, Burden AD, Capon F, et al. European consensus statement on phenotypes of pustular psoriasis. *J Eur Acad Dermatol Venereol.* 2017;31:1792–9.
2. Fujita H, Terui T, Hayama K, et al. Japanese guidelines for the management and treatment of generalized pustular psoriasis: the new pathogenesis and treatment of GPP. *J Dermatol.* 2018;45:1235–70.
3. Bachelez H. Pustular psoriasis: the dawn of a new era. *Acta Derm Venereol.* 2020;100:adv00034.
4. Augey F, Renaudier P, Nicolas JF. Generalized pustular psoriasis (Zumbusch): a French epidemiological survey. *Eur J Dermatol.* 2006;16:669–73.
5. Schäfer I, Rustenbach SJ, Radtke M, Augustin J, Glaeske G, Augustin M. Epidemiology of psoriasis in Germany—analysis of secondary health insurance data. *Gesundheitswesen.* 2011;73:308–13.
6. Ohkawara A, Yasuda H, Kobayashi H, et al. Generalized pustular psoriasis in Japan: two distinct groups formed by differences in symptoms and genetic background. *Acta Derm Venereol.* 1996;76:68–71.
7. von Zumbusch LR. Psoriasis und pustulöses exanthem. *Arch Dermatol Syph.* 1909;99:335–46.
8. Benjegerdes KE, Hyde K, Kivelevitch D, Mansouri B. Pustular psoriasis: pathophysiology and current treatment perspectives. *Psoriasis (Auckl).* 2016;6:131–44.
9. Gooderham MJ, Van Voorhees AS, Lebwohl MG. An update on generalized pustular psoriasis. *Expert Rev Clin Immunol.* 2019;15:907–19.
10. Golembesky AK, Kotowsky N, Gao R, Yamazaki H. PRO16 Healthcare resource utilization (HCRU) in patients with generalized pustular psoriasis (GPP) in Japan: a claims database study. *Value Health Reg Issues.* 2020;22:S98.
11. Choon SE, Lai NM, Mohammad NA, Nanu NM, Tey KE, Chew SF. Clinical profile, morbidity, and outcome of adult-onset generalized pustular psoriasis: analysis of 102 cases seen in a tertiary hospital in Johor, Malaysia. *Int J Dermatol.* 2014;53:676–84.



12. Borges-Costa J, Silva R, Gonçalves L, Filipe P, Soares de Almeida L, Marques Gomes M. Clinical and laboratory features in acute generalized pustular psoriasis: a retrospective study of 34 patients. *Am J Clin Dermatol*. 2011;12:271–6.
13. Boehner A, Navarini AA, Eyerich K. Generalized pustular psoriasis—a model disease for specific targeted immunotherapy, systematic review. *Exp Dermatol*. 2018;27:1067–77.
14. Furue K, Ulzii D, Tanaka Y, et al. Pathogenic implication of epidermal scratch injury in psoriasis and atopic dermatitis. *J Dermatol*. 2020;47:979–88.
15. Akiyama M, Takeichi T, McGrath JA, Sugiura K. Autoinflammatory keratinization diseases. *J Allergy Clin Immunol*. 2017;140:1545–7.
16. Akiyama M, Takeichi T, McGrath JA, Sugiura K. Autoinflammatory keratinization diseases: an emerging concept encompassing various inflammatory keratinization disorders of the skin. *J Dermatol Sci*. 2018;90:105–11.
17. Neuhauser R, Eyerich K, Boehner A. Generalized pustular psoriasis—dawn of a new era in targeted immunotherapy. *Exp Dermatol*. 2020;29:1088–96.
18. Robinson A, Van Voorhees AS, Hsu S, et al. Treatment of pustular psoriasis: from the Medical Board of the National Psoriasis Foundation. *J Am Acad Dermatol*. 2012;67:279–88.
19. Umezawa Y, Ozawa A, Kawasima T, et al. Therapeutic guidelines for the treatment of generalized pustular psoriasis (GPP) based on a proposed classification of disease severity. *Arch Dermatol Res*. 2003;295(Suppl 1):S43–54.
20. Crowley JJ, Pariser DM, Yamauchi PS. A brief guide to pustular psoriasis for primary care providers. *Postgrad Med*. 2021;133:330–44.
21. Feldmeyer L, Heidemeyer K, Yawalkar N. Acute generalized exanthematous pustulosis: pathogenesis, genetic background, clinical variants and therapy. *Int J Mol Sci*. 2016;17:1214.
22. Kardaun SH, Kuiper H, Fidler V, Jonkman MF. The histopathological spectrum of acute generalized exanthematous pustulosis (AGEP) and its differentiation from generalized pustular psoriasis. *J Cutan Pathol*. 2010;37:1220–9.
23. UCB. CIMZIA® (certolizumab pegol) now available for patients in Japan living with multiple psoriatic diseases. 2020. <https://www.ucb.com/stories-media/Press-Releases/article/CIMZIA-certolizumab-pegol-now-Available-for-Patients-in-Japan-living-with-Multiple-Psoriatic-Diseases>. Accessed 21 Jan 2021.
24. Pharmaceuticals and Medical Devices Agency. Report on the deliberation of results. Tremfya subcutaneous injection 100 mg syringe (guselkumab). 2018. <https://www.pmda.go.jp/files/000234741.pdf>. Accessed Dec 2020.
25. Abbvie. AbbVie announces first regulatory approval of SKYRIZI™ (risankizumab) for the treatment of plaque psoriasis, generalized pustular psoriasis and erythrodermic psoriasis and psoriatic arthritis in Japan. 2019. <https://news.abbvie.com/news/abbvie-announces-first-regulatory-approval-skyrizi-risankizumab-for-treatment-plaque-psoriasis-generalized-pustular-psoriasis-and-erythrodermic-psoriasis-and-psoriatic-arthritis-in-japan.htm>. Accessed 21 Jan 2021.
26. Stephenson C, Prajapati VH, Hunter C, Miettunen P. Novel use of Autoinflammatory Diseases Activity Index (AIDAI) captures skin and extracutaneous features to help manage pediatric DITRA: a case report and a proposal for a modified disease activity index in autoinflammatory keratinization disorders. *Pediatr Dermatol*. 2020;37:670–6.
27. Wang WM, Jin HZ. Biologics in the treatment of pustular psoriasis. *Expert Opin Drug Saf*. 2020;19:969–80.
